# Supplementary material for: Current management of cervical cancer in Poland—Analysis of the questionnaire trial for the years 2002-2014 in relation to ASCO 2016 recommendations
Source: PubMed Central journal article supplement (PMC6354992; doi:10.1371/journal.pone.0209901), 2019-01-31
Supplement: pone.0209901.s002.pdf [file pone.0209901.s002.pdf]

NUMER OŚRODKA I PACJENTKI

nr ośrodka

nr pacjentki

1

ZAAWANSOWANIE CHOROBY

IA  IB  IIA  IIB  IIIA  IIIB  IVA  IVB

TYP HISTOLOGICZNY NOWOTWORU: .....

WSPÓŁISTNIENIE CIĄŻY ( w trakcie leczenia oraz do 12 miesięcy po zakończeniu) TAK  NIE

KLASYFIKACJA FIGO: .....

2

RODZAJ LECZENIA PIERWOTNEGO

Zabieg chirurgiczny

LEEP/LETZ  elektrokonizacja  konizacja  usunięcie narządu rodnego

CZAS POBYTU NA ODDZIALE: .....

CZAS POBYTU NA SALI OPERACYJNEJ: ..... min.

Brachyterapia

EBT:

radiochemioterapia  radioterapia

CHT:

rodzaj chemioterapii: .....

.....

.....

liczba cykli: .....

powody zakończenia leczenia: remisja  działania niepożądane  stabilizacja  progresja

Data rozpoczęcia leczenia pierwotnego: .....

Data zakończenia leczenia pierwotnego: .....

3

## POWIKŁANIA

przetoka

rodzaj przetoki: . . . . .

data operacji przetoki: . . . . .

powikłania hematologiczne

zastosowane leczenie: . . . . .

. . . . .

powikłania nefrologiczne

zastosowane leczenie: . . . . .

. . . . .

powikłania hepatologiczne

zastosowane leczenie: . . . . .

. . . . .

powikłania ze strony układu krążenia

zastosowane leczenie: . . . . .

. . . . .

powikłania neurologiczne

zastosowane leczenie: . . . . .

. . . . .

powikłania pokarmowe

zastosowane leczenie: . . . . .

. . . . .

obrzęki limfatyczne

zastosowane leczenie: . . . . .

. . . . .

## BADANIA OBRAZOWE W TRAKCIE DIAGNOSTYKI I LECZENIA PIERWOTNEGO

TK                                      liczba: . . . . .

USG                                        liczba: . . . . .

rezonans                                liczba: . . . . .

scyntygrafia                            liczba: . . . . .

PET                                        liczba: . . . . .

kolposkopia                            liczba: . . . . .

## LECZENIA WZNOWY I

TREATMENT FREE SURVIVAL (CZAS OD ZAKOŃCZENIA LECZENIA PIERWOTNEGO DO ROZPOCZĘCIA LECZENIA WZNOWY) :

..... (tygodnie)

RODZAJ PROGRESJI:

wznowa miejscowa

przerzuty odległe

6

RODZAJ LECZENIA WZNOWY I

Zabieg chirurgiczny

LEEP/LETZ  elektrokonizacja  konizacja  usunięcie narządu rodnego

CZAS POBYTU NA ODDZIALE: ..... dni

CZAS POBYTU NA SALI OPERACYJNEJ ..... min.

Brachyterapia

EBT:

radiochemioterapia  radioterapia

CHT:

rodzaj chemioterapii .....

.....

.....

liczba cykli: .....

powody zakończenia leczenia: remisja  działania niepożądane  stabilizacja  progresja

Data rozpoczęcia leczenia wznowy I: .....

Data zakończenia leczenia wznowy I: .....

7

## POWIKŁANIA

przetoka

rodzaj przetoki: . . . . .

data operacji przetoki: . . . . .

powikłania hematologiczne

zastosowane leczenie: . . . . .

. . . . .

powikłania nefrologiczne

zastosowane leczenie: . . . . .

. . . . .

powikłania hepatologiczne

zastosowane leczenie: . . . . .

. . . . .

powikłania ze strony układu krążenia

zastosowane leczenie: . . . . .

. . . . .

powikłania neurologiczne

zastosowane leczenie: . . . . .

. . . . .

powikłania pokarmowe

zastosowane leczenie: . . . . .

. . . . .

obrzęki limfatyczne

zastosowane leczenie: . . . . .

. . . . .

## BADANIA OBRAZOWE W TRAKCIE DIAGNOSTYKI I LECZENIA WZNOWY

TK                                      liczba: . . . . .

USG                                      liczba: . . . . .

rezonans                              liczba: . . . . .

scyntygrafia                              liczba: . . . . .

PET                                      liczba: . . . . .

kolposkopia                              liczba: . . . . .

## LECZENIA WZNOWY II

TREATMENT FREE SURVIVAL (CZAS OD ZAKOŃCZENIA LECZENIA WZNOWY I DO ROZPOCZĘCIA LECZENIA WZNOWY II):  
..... (tygodnie)

RODZAJ PROGRESJI:

- wznowa miejscowa
- przerzuty odległe

10

RODZAJ LECZENIA WZNOWY II

Zabieg chirurgiczny

LEEP/LETZ  elektrokonizacja  konizacja  usunięcie narządu rodnego

CZAS POBYTU NA ODDZIALE: ..... dni

CZAS POBYTU NA SALI OPERACYJNEJ ..... min.

Brachyterapia

EBT:

radiochemioterapia  radioterapia

CHT:

rodzaj chemioterapii .....

.....

.....

liczba cykli: .....

powody zakończenia leczenia: remisja  działania niepożądane  stabilizacja  progresja

Data rozpoczęcia leczenia wznowy II: .....

Data zakończenia leczenia wznowy II: .....

11

## POWIKŁANIA

przetoka

rodzaj przetoki: . . . . .

data operacji przetoki: . . . . .

powikłania hematologiczne

zastosowane leczenie: . . . . .

. . . . .

powikłania nefrologiczne

zastosowane leczenie: . . . . .

. . . . .

powikłania hepatologiczne

zastosowane leczenie: . . . . .

. . . . .

powikłania ze strony układu krążenia

zastosowane leczenie: . . . . .

. . . . .

powikłania neurologiczne

zastosowane leczenie: . . . . .

. . . . .

powikłania pokarmowe

zastosowane leczenie: . . . . .

. . . . .

obrzęki limfatyczne

zastosowane leczenie: . . . . .

. . . . .

## BADANIA OBRAZOWE W TRAKCIE DIAGNOSTYKI I LECZENIA WZNOWY II

TK                                      liczba: . . . . .

USG                                        liczba: . . . . .

rezonans                                liczba: . . . . .

scyntygrafia                            liczba: . . . . .

PET                                        liczba: . . . . .

kolposkopia                            liczba: . . . . .

## LECZENIA WZNOWY III

TREATMENT FREE SURVIVAL (CZAS OD ZAKOŃCZENIA LECZENIA WZNOAWYII DO ROZPOCZĘCIA LECZENIA WZNOWY III) :

..... (tygodnie)

RODZAJ PROGRESJI:

- wznowa miejscowa
- przerzuty odległe

14

RODZAJ LECZENIA WZNOWY III

Zabieg chirurgiczny

LEEP/LETZ  elektrokonizacja  konizacja  usunięcie narządu rodnego

CZAS POBYTU NA ODDZIALE: ..... dni

CZAS POBYTU NA SALI OPERACYJNEJ ..... min.

Brachyterapia

EBT:

radiochemioterapia  radioterapia

CHT:

rodzaj chemioterapii .....

.....

.....

liczba cykli: .....

powody zakończenia leczenia: remisja  działania niepożądane  stabilizacja  progresja

Data rozpoczęcia leczenia wznowy III: .....

Data zakończenia leczenia wznowy III: .....

15

## POWIKŁANIA

przetoka

rodzaj przetoki: . . . . .

data operacji przetoki: . . . . .

powikłania hematologiczne

zastosowane leczenie: . . . . .

. . . . .

powikłania nefrologiczne

zastosowane leczenie: . . . . .

. . . . .

powikłania hepatologiczne

zastosowane leczenie: . . . . .

. . . . .

powikłania ze strony układu krążenia

zastosowane leczenie: . . . . .

. . . . .

powikłania neurologiczne

zastosowane leczenie: . . . . .

. . . . .

powikłania pokarmowe

zastosowane leczenie: . . . . .

. . . . .

obrzęki limfatyczne

zastosowane leczenie: . . . . .

. . . . .

## BADANIA OBRAZOWE W TRAKCIE DIAGNOSTYKI I LECZENIA WZNOWY III

TK                                      liczba: . . . . .

USG                                      liczba: . . . . .

rezonans                              liczba: . . . . .

scyntygrafia                              liczba: . . . . .

PET                                      liczba: . . . . .

kolposkopia                              liczba: . . . . .
